# Supplementary material for: Appetitive olfactory learning suffers in ants when octopamine or dopamine receptors are blocked
Source: Oxford University Press journal article supplement (doi:10.1242/jeb.242732), 2021-07-20
Supplement: jeb242732supp.pdf [file jeb242732supp.pdf]

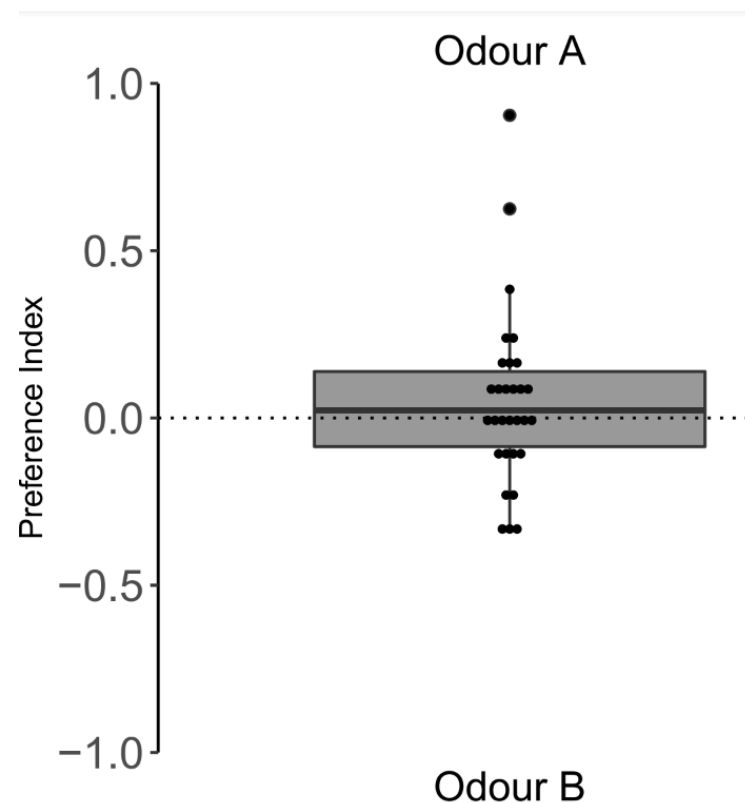

**Fig. S1.** The preference index of untrained ants for odour mixture A over odour mixture B when presented on glass slides. The odour mixtures were later used as rewarded stimulus (CS+) and unrewarded stimulus (CS0) in the learning experiments. Both odour mixtures contained equal proportions of three n-alkanes (odour A: n-C18, n-C21, and n-C27; odour B: n-C20, n-C22, n-C25), and the ants did not prefer either ( $n = 30$ , wilcoxon test  $V = 253$ ,  $p = 0.69$ ).

**Table S1.** The number of ants that entered the learning trials, and the sample size of the following retention tests after removing ants that did not find the sugar solution during at least two learning trials, or died before the second retention test.

| Experiment  | Treatment              | Sample Size | Sample Size – Adjusted |
|-------------|------------------------|-------------|------------------------|
| Application | DMF – Control          | 76          | 76                     |
|             | Epinastine 20mM        | 45          | 45                     |
|             | Epinastine 100mM       | 29          | 29                     |
|             | Flupentixol 250mM      | 32          | 30                     |
|             |                        |             |                        |
| Feeding     | Untreated – Control    | 30          | 30                     |
|             | Epinastine 1-3 Hours   | 30          | 27                     |
|             | Epinastine 5-8 Hours   | 29          | 29                     |
|             | Epinastine 17-26 Hours | 27          | 25                     |
|             | Flupentixol 1-3 Hours  | 28          | 26                     |
|             | Flupentixol 5-8 Hours  | 25          | 21                     |

**Table S2.** MCMCglmm on preference indices during retention tests of ants fed with receptor blockers. The table contains the results of two independent models for day 1 and day 2. Each model contained colony ID and ant ID as random factors. For each factor level we report the effect (mean of the posterior distribution, i.e. the effect size of treatment compared to the control, measured in PI units), the limits of its 95% confidence interval (CI), the effective sample size as a measure of model convergence, and the p value derived from the posterior distribution.

| <b>Response Variable</b> | <b>Treatment</b>       | <b>Effect</b> | <b>Lower 95% CI</b> | <b>Upper 95% CI</b> | <b>Effective Sample</b> | <b>p</b> |
|--------------------------|------------------------|---------------|---------------------|---------------------|-------------------------|----------|
| Preference Index Day 1   | Control PI             | 0.19          | 0.11                | 0.26                | 1205                    | < 0.001  |
|                          | Epinastine 1-3 Hours   | -0.02         | -0.14               | 0.08                | 1000                    | 0.656    |
|                          | Epinastine 5-8 Hours   | -0.10         | -0.21               | 0.01                | 1000                    | 0.058    |
|                          | Epinastine 17-26 Hours | -0.06         | -0.18               | 0.05                | 1000                    | 0.300    |
|                          | Flupentixol 1-3 Hours  | -0.10         | -0.22               | 0.00                | 1000                    | 0.070    |
|                          | Flupentixol 5-8 Hours  | -0.09         | -0.20               | 0.03                | 1000                    | 0.158    |
| Preference Index Day 2   | Control PI             | 0.08          | 0.02                | 0.15                | 1128                    | 0.018    |
|                          | Epinastine 1-3 Hours   | -0.08         | -0.17               | 0.02                | 985                     | 0.102    |
|                          | Epinastine 5-8 Hours   | -0.00         | -0.10               | 0.09                | 1000                    | 0.962    |
|                          | Epinastine 17-26 Hours | 0.05          | -0.05               | 0.14                | 1075                    | 0.332    |
|                          | Flupentixol 1-3 Hours  | -0.01         | -0.11               | 0.09                | 1000                    | 0.852    |
|                          | Flupentixol 5-8 Hours  | -0.02         | -0.12               | 0.08                | 1000                    | 0.758    |

**Table S3.** MCMCglmm on preference indices during retention tests of ants that received a topical application of receptor blockers.

The table contains the results of two independent models for day 1 and day 2. Each model contained colony ID and ant ID as random factors. For each factor level we report the effect size (mean of the posterior distribution, i.e. the effect size of treatment compared to the control, measured in PI units), the limits of its 95% confidence interval (CI), the effective sample size as a measure of model convergence, and the p value derived from the posterior distribution.

| <b>Response Variable</b>  | <b>Treatment</b>  | <b>Effect</b> | <b>Lower 95% CI</b> | <b>Upper 95% CI</b> | <b>Effective Sample</b> | <b>p</b> |
|---------------------------|-------------------|---------------|---------------------|---------------------|-------------------------|----------|
| Preference Index<br>Day 1 | Control PI        | 0.23          | 0.15                | 0.29                | 1000                    | < 0.001  |
|                           | Epinastine 20mM   | -0.04         | -0.15               | 0.07                | 1000                    | 0.480    |
|                           | Epinastine 100mM  | -0.22         | -0.34               | -0.08               | 1000                    | 0.002    |
|                           | Flupentixol 250mM | -0.09         | -0.22               | 0.04                | 1000                    | 0.164    |
| Preference Index<br>Day 2 | Control PI        | 0.33          | 0.26                | 0.39                | 1000                    | < 0.001  |
|                           | Epinastine 20mM   | -0.11         | -0.20               | -0.00               | 1562                    | 0.032    |
|                           | Epinastine 100mM  | -0.42         | -0.55               | -0.31               | 1071                    | < 0.001  |
|                           | Flupentixol 250mM | -0.24         | -0.36               | -0.13               | 1000                    | < 0.001  |

**Table S4.** glmm on the walking speed of ants in the retention tests after topical application of receptor blockers. The table contains the results of two independent models for day 1 and day 2. Each model contained colony ID and ant ID as random factors. For each factor level we report the effect (mean of the posterior distribution, i.e. the effect size of treatment compared to the control, measured in mm/sec), the limits of its 95% confidence interval (CI), the effective sample size as a measure of model convergence, and the p value derived from the posterior distribution.

| Response Variable   | Treatment         | Effect | Lower 95% CI | Upper 95% CI | Effective Sample | p       |
|---------------------|-------------------|--------|--------------|--------------|------------------|---------|
| Average Speed Day 1 | Control PI        | 26.4   | 24.6         | 28.5         | 1000             | < 0.001 |
|                     | Epinaatine 20mM   | -4.4   | -7.2         | -1.3         | 902              | 0.002   |
|                     | Epinaatine 100mM  | -6.0   | -9.6         | -2.5         | 409              | 0.001   |
|                     | Flupentixol 250mM | -1.9   | -5.3         | 1.5          | 784              | 0.294   |
| Average Speed Day 2 | Control PI        | 22.5   | 20.1         | 25.2         | 1000             | < 0.001 |
|                     | Epinaatine 20mM   | -0.6   | -2.9         | 1.6          | 1000             | 0.624   |
|                     | Epinaatine 100mM  | -2.9   | -5.6         | -0.4         | 895              | 0.030   |
|                     | Flupentixol 250mM | -0.6   | -3.4         | 2.2          | 1000             | 0.694   |

**Supplementary Materials and Methods.** (pdf) Code and output for the statistical analyses presented in the paper, as conducted in R.

[Click here to download Supplementary Materials and Methods](#)
